# Supplementary material
Source: PubMed Central journal article supplement (PMC7013262)
Supplement: baADV2019000827-suppl1.pdf [file baADV2019000827-suppl1.pdf]

# SUPPLEMENTAL MATERIALS

**Supplemental Figure 1 : Clinical Course of All 27 Severe Acquired Autoimmune TTP Patients\***

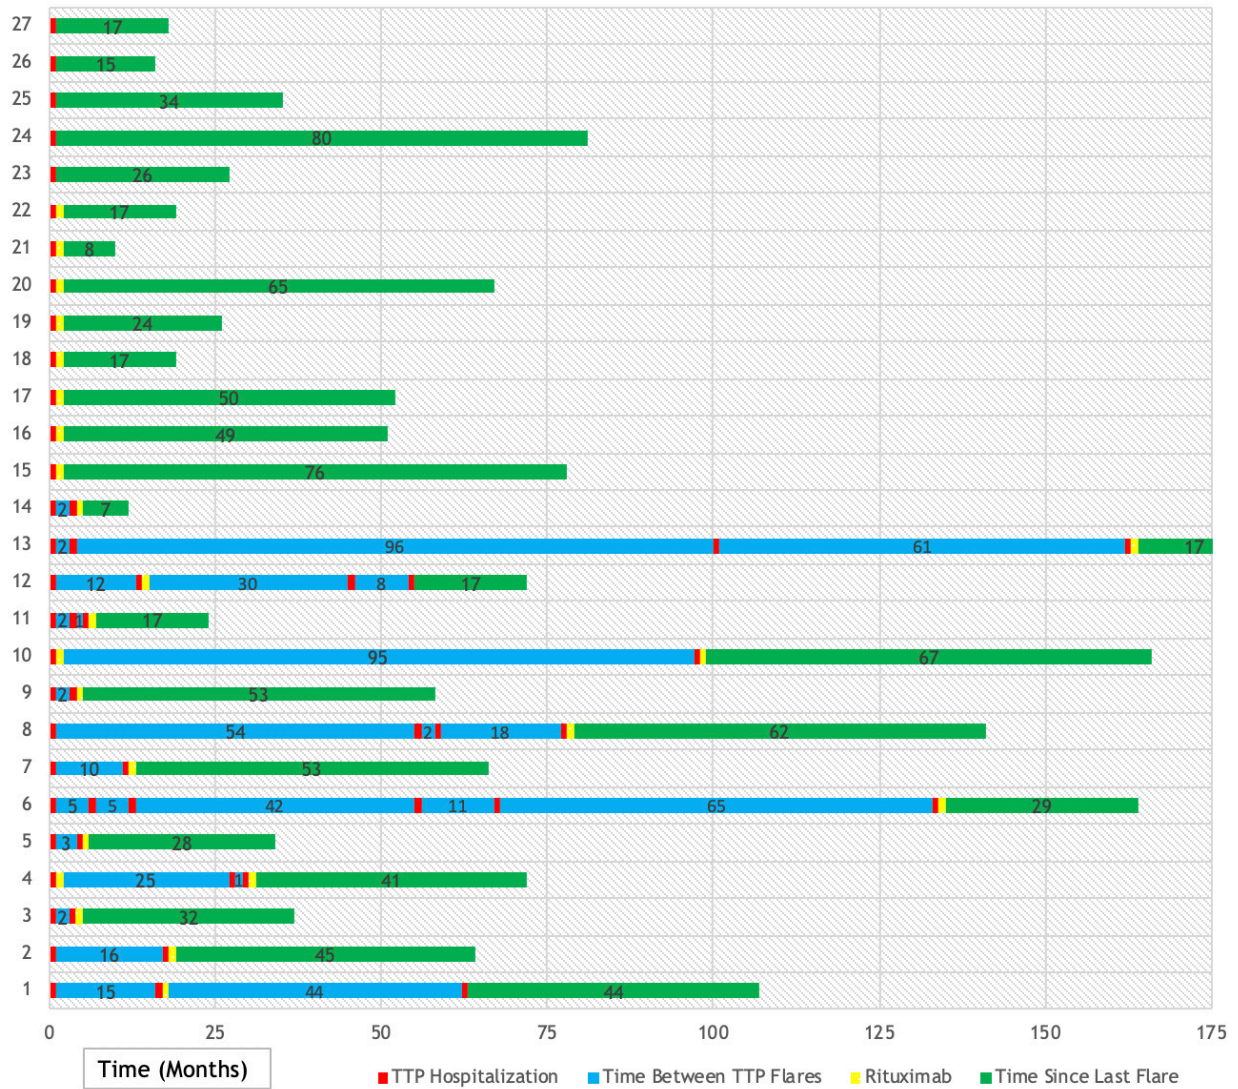

\*Numbers in each bar represent time in months.
